# Supplementary material for: A flexible fiber-shaped supercapacitor utilizing hierarchical NiCo2O4@polypyrrole core–shell nanowires on hemp-derived carbon
Source: Royal Society of Chemistry journal article supplement (doi:10.1039/c5ta04201a), 2015-01-01
Supplement: c5ta04201a1.pdf [file c5ta04201a1.pdf]

## Supporting Information

### Flexible fiber-shaped supercapacitor utilizing hierarchical $\text{NiCo}_2\text{O}_4$ @Polypyrrole core-shell nanowires on hemp-derived carbon

Wei Xiong,<sup>a</sup> Xuan Hu,<sup>a</sup> Xu Wu,<sup>a</sup> Yan Zeng,<sup>b</sup> Bo Wang,<sup>c</sup> Guanhong He<sup>a</sup> and Zhihong Zhu<sup>\*a</sup>

<sup>a</sup> Institute of Nano-science and Nano-technology, College of Physical Science and Technology, Central China Normal University, Wuhan, 430079, China.

<sup>b</sup> College of Chemistry and Technology, Central China Normal University, Wuhan, 430079, China

<sup>c</sup> MOA Key Laboratory of Crop Ecophysiology and Farming System in the Middle Reaches of the Yangtze River, College of Plant Science and Technology, Huazhong Agricultural University, Hongshan District, Wuhan, 430070, China

**\*Corresponding author:**

Zhihong Zhu: e-mail: [zhzhu@phy.ccnu.edu.cn](mailto:zhzhu@phy.ccnu.edu.cn); Tel: +86-2767861185

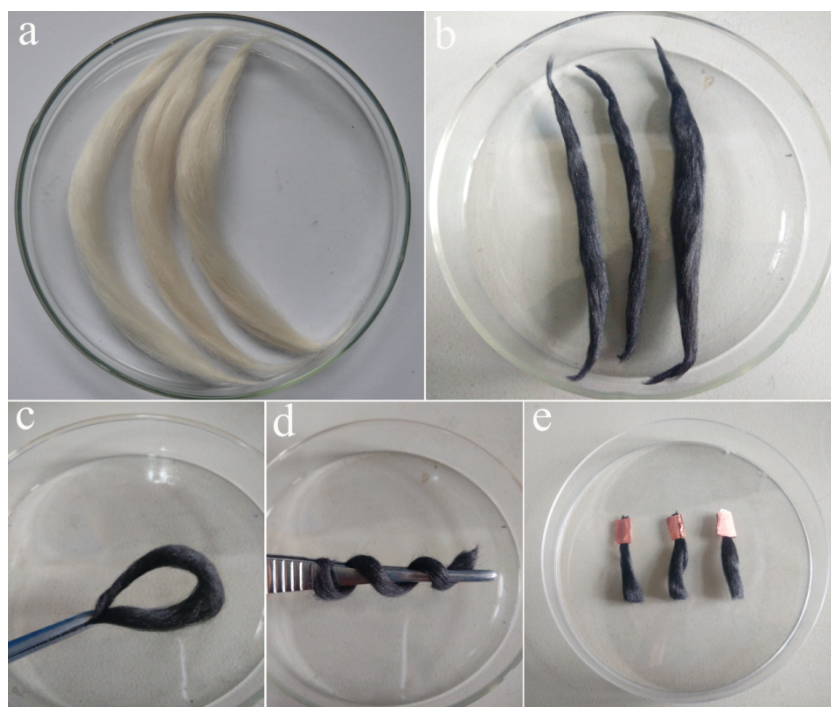

**Fig. S1.** (a-b) Photographs of the original hemp fibers and HDC. (c-e) Photographs of the flexible HDC.

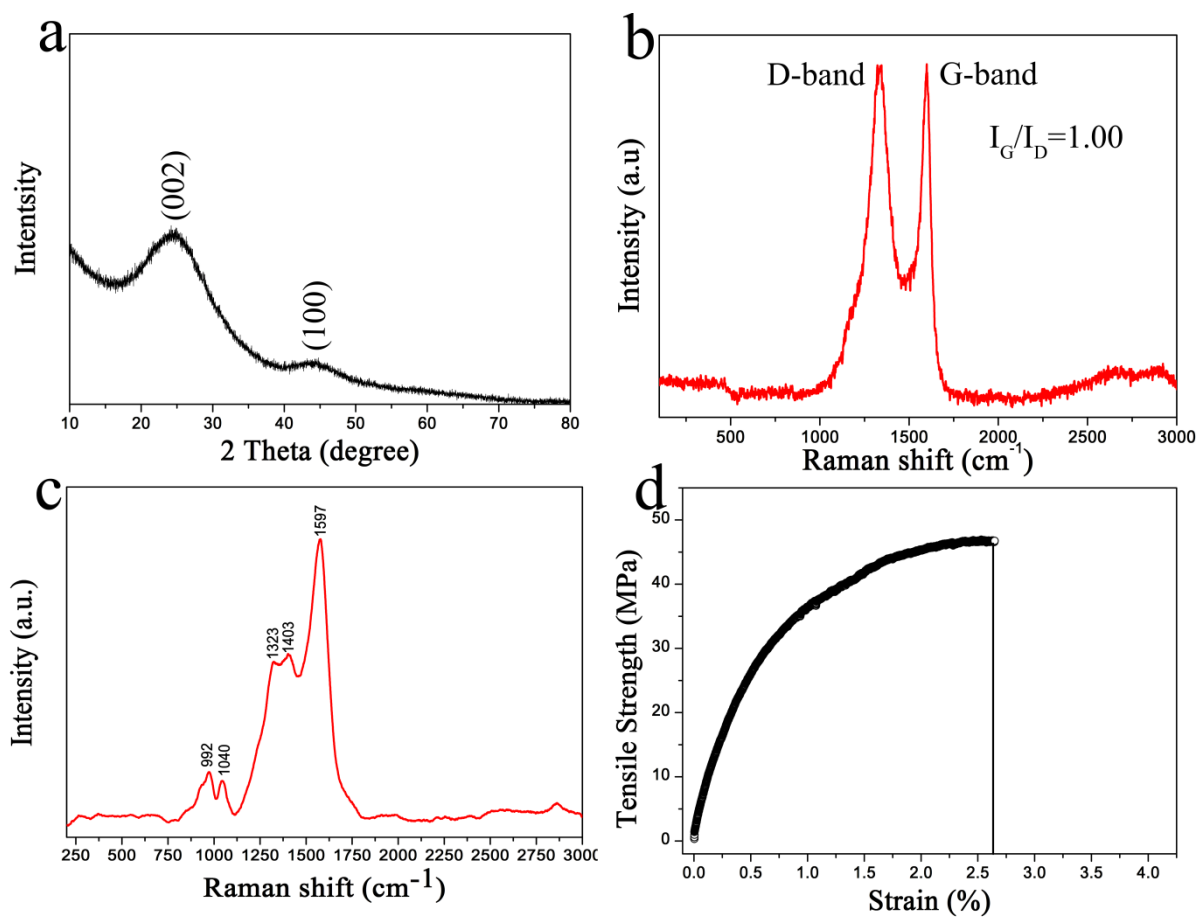

**Fig. S2.** (a-b) The XRD pattern and Raman spectra of HDC. (c) Raman spectra of HDC@NiCo<sub>2</sub>O<sub>4</sub>@PPy composites. (d) Typical stress-strain curves of the fiber-shaped SCs.
